# Supplementary material for: Still No Substantial Evidence to Use Prophylactic Antibiotic at Operative Vaginal Delivery: Systematic Review and Meta-Analysis
Source: Hindawi journal article supplement (doi:10.1155/2020/1582653), 2020-05-19
Supplement: f1 [file 1582653.f1.pdf]

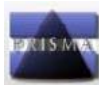

# PRISMA 2009 Checklist (Adapted for KIN 4400)

| Section/topic                                                                                                                 | #  | Checklist item                                                                                                                                                                                                                                                       | Reported on page # |
|-------------------------------------------------------------------------------------------------------------------------------|----|----------------------------------------------------------------------------------------------------------------------------------------------------------------------------------------------------------------------------------------------------------------------|--------------------|
| <b>TITLE: Still no substantial evidence to use prophylactic antibiotic at operative vaginal delivery: a systematic review</b> |    |                                                                                                                                                                                                                                                                      |                    |
| Title                                                                                                                         | 1  | Identify the report as a literature review.                                                                                                                                                                                                                          | 1                  |
| <b>ABSTRACT</b>                                                                                                               |    |                                                                                                                                                                                                                                                                      |                    |
| Structured summary                                                                                                            | 2  | Provide a structured summary including, as applicable: background; objectives; data sources; study eligibility criteria, participants, and interventions; study appraisal and synthesis methods; results; limitations; conclusions and implications of key findings; | 2                  |
| <b>INTRODUCTION</b>                                                                                                           |    |                                                                                                                                                                                                                                                                      |                    |
| Rationale                                                                                                                     | 3  | Describe the rationale for the review in the context of what is already known about your topic.                                                                                                                                                                      | 3-4                |
| Objectives                                                                                                                    | 4  | Provide an explicit statement of questions being addressed with reference to participants, interventions, comparisons, outcomes, and study design (PICOS).                                                                                                           | 4                  |
| <b>METHODS</b>                                                                                                                |    |                                                                                                                                                                                                                                                                      |                    |
| Eligibility criteria                                                                                                          | 5  | Specify study characteristics (e.g., PICOS, length of follow-up) and report characteristics (e.g., years considered, language, publication status) used as criteria for eligibility, giving rationale.                                                               | 5                  |
| Information sources                                                                                                           | 6  | Describe all information sources (e.g., databases with dates of coverage) in the search and date last searched.                                                                                                                                                      | 5                  |
| Search                                                                                                                        | 7  | Present full electronic search strategy for at least one database, including any limits used, such that it could be repeated.                                                                                                                                        | 5                  |
| Study selection                                                                                                               | 8  | State the process for selecting studies (i.e., screening, eligibility).                                                                                                                                                                                              | 5-6                |
| Risk of bias in individual studies                                                                                            | 9  | Describe methods used for assessing risk of bias of individual studies (including specification of whether this was done at the study or outcome level).                                                                                                             | 6                  |
| Risk of bias across studies                                                                                                   | 10 | Specify any assessment of risk of bias that may affect the cumulative evidence (e.g., publication bias, selective reporting within studies).                                                                                                                         | 6                  |
| <b>RESULTS</b>                                                                                                                |    |                                                                                                                                                                                                                                                                      |                    |
| Study selection                                                                                                               | 11 | Give numbers of studies screened, assessed for eligibility, and included in the review, with reasons for exclusions at each stage, ideally with a flow diagram.                                                                                                      | 8                  |
| Study characteristics                                                                                                         | 12 | For each study, present characteristics for which data were extracted (e.g., study size, PICOS, follow-up period) and provide the citations.                                                                                                                         | 8                  |



## PRISMA 2009 Checklist (Adapted for KIN 4400)

| Section/topic                              | #  | Checklist item                                                                                                                                                                                                                            | Reported on page # |
|--------------------------------------------|----|-------------------------------------------------------------------------------------------------------------------------------------------------------------------------------------------------------------------------------------------|--------------------|
| Synthesis of results of individual studies | 13 | For all outcomes considered (benefits or harms), present, for each study: (a) summary of results and (b) relationship to other studies under review (e.g. agreements or disagreements in methods, sampling, data collection or findings). | 8-12               |
| <b>DISCUSSION</b>                          |    |                                                                                                                                                                                                                                           |                    |
| Summary of evidence                        | 14 | Summarize the main findings including the strength of evidence for each main outcome; consider their relevance to key groups (e.g., healthcare providers, users, and policy makers).                                                      | 12-16              |
| Limitations                                | 15 | Discuss limitations at study and outcome level (e.g., risk of bias), and at review-level (e.g., incomplete retrieval of identified research, reporting bias).                                                                             | 17                 |
| <b>CONCLUSION</b>                          |    |                                                                                                                                                                                                                                           |                    |
| Conclusions                                | 16 | Provide a general interpretation of the results in the context of other evidence, and implications for future research.                                                                                                                   | 17                 |

Adapted from: Moher D, Liberati A, Tetzlaff J, Altman DG, The PRISMA Group (2009). Preferred Reporting Items for Systematic Reviews and Meta-Analyses: The PRISMA statement. *PLoS Medicine*, 6(6), e1000097. doi:10.1371/journal.pmed1000097

For more information, visit: [www.prisma-statement.org](http://www.prisma-statement.org).

Title of the article: **Still no substantial evidence to use prophylactic antibiotic at operative vaginal delivery: systematic review and meta-analysis**

STROBE guidelines

| Section/topic            | Item number | Recommendation                                                                                                                                                                                                                                                                                                                                                                                                                                                                                                                                                                                                                                                   |
|--------------------------|-------------|------------------------------------------------------------------------------------------------------------------------------------------------------------------------------------------------------------------------------------------------------------------------------------------------------------------------------------------------------------------------------------------------------------------------------------------------------------------------------------------------------------------------------------------------------------------------------------------------------------------------------------------------------------------|
| Title and abstract       | 1           | Indicates the study's design with a commonly used term in the title or the abstract<br>Provide in the abstract an informative and balanced summary of what was done and what was found                                                                                                                                                                                                                                                                                                                                                                                                                                                                           |
| Introduction             |             |                                                                                                                                                                                                                                                                                                                                                                                                                                                                                                                                                                                                                                                                  |
| Background/rationale     | 2           | Explains the scientific background and rationale for the investigation being reported                                                                                                                                                                                                                                                                                                                                                                                                                                                                                                                                                                            |
| Objectives               | 3           | States specific objectives, including any prespecified hypotheses                                                                                                                                                                                                                                                                                                                                                                                                                                                                                                                                                                                                |
| Methods                  |             |                                                                                                                                                                                                                                                                                                                                                                                                                                                                                                                                                                                                                                                                  |
| Study design             | 4           | Presents key elements of study design early in the manuscript                                                                                                                                                                                                                                                                                                                                                                                                                                                                                                                                                                                                    |
| Setting                  | 5           | Describes the setting, locations, and relevant dates, including periods of recruitment, exposure, follow-up, and data collection                                                                                                                                                                                                                                                                                                                                                                                                                                                                                                                                 |
| Participants             | 6           | Cohort study - gives the eligibility criteria, and the sources and methods of selection of participants; describe methods of follow-up<br>Case-control study - gives the eligibility criteria, and the sources and methods of case ascertainment and control selection; gives the rationale for the choice of cases and controls<br>Cross-sectional study - gives the eligibility criteria, and the sources and methods of selection of participants<br>Cohort study - for matched studies, gives matching criteria and number of exposed and unexposed<br>Case-control study - for matched studies, gives matching criteria and the number of controls per case |
| Variables                | 7           | Clearly defines all outcomes, exposures, predictors, potential confounders, and effect modifiers; give diagnostic criteria, if applicable                                                                                                                                                                                                                                                                                                                                                                                                                                                                                                                        |
| Data sources/measurement | 8           | For each variable of interest, gives sources of data and details of methods of assessment (measurement); Describes comparability of assessment methods if there is more than one group                                                                                                                                                                                                                                                                                                                                                                                                                                                                           |
| Bias                     | 9           | Describes any efforts to address potential sources of bias                                                                                                                                                                                                                                                                                                                                                                                                                                                                                                                                                                                                       |
| Study size               | 10          | Explains how the study size was arrived at                                                                                                                                                                                                                                                                                                                                                                                                                                                                                                                                                                                                                       |
| Quantitative variables   | 11          | Explains how quantitative variables were handled in the analyses; if applicable, describes which groupings were chosen and why                                                                                                                                                                                                                                                                                                                                                                                                                                                                                                                                   |
| Statistical methods      | 12          | Describes all statistical methods, including those used to control for confounding                                                                                                                                                                                                                                                                                                                                                                                                                                                                                                                                                                               |

| Section/topic    | Item number | Recommendation                                                                                                                                                                                                                                                                                                                                                                                                                             |
|------------------|-------------|--------------------------------------------------------------------------------------------------------------------------------------------------------------------------------------------------------------------------------------------------------------------------------------------------------------------------------------------------------------------------------------------------------------------------------------------|
|                  |             | Describe any methods used to examine subgroups and interactions<br>Explains how missing data were addressed<br>Cohort study - if applicable, explains how loss to follow-up was addressed<br>Case-control study - if applicable, explains how matching of cases and controls was addressed<br>Cross-sectional study - if applicable, describes analytical methods taking account of sampling strategy<br>Describe any sensitivity analyses |
| Results          |             |                                                                                                                                                                                                                                                                                                                                                                                                                                            |
| Participants     | 13          | Reports numbers of individuals at each stage of study - e.g., numbers potentially eligible, examined for eligibility, confirmed eligible, included in the study, completing follow-up, and analyzed<br>Give reasons for nonparticipation at each stage Consider use of a flow diagram                                                                                                                                                      |
| Descriptive data | 14          | Gives characteristics of study participants (e.g., demographic, clinical, social) and information on exposures and potential confounders<br>Indicate number of participants with missing data for each variable of interest Cohort study - summarize follow-up time (e.g., average and total amount)                                                                                                                                       |
| Outcome data     | 15          | Cohort study - reports numbers of outcome events or summary measures over time<br>Case-control study - report numbers in each exposure category, or summary measures of exposure<br>Cross-sectional study - reports numbers of outcome events or summary measures                                                                                                                                                                          |
| Main results     | 16          | Gives unadjusted estimates and, if applicable, confounder-adjusted estimates and their precision (e.g., 95% confidence interval); make clear which confounders were adjusted for and why they were included Report category boundaries when continuous variables were categorized<br>If relevant, consider translating estimates of relative risk into absolute risk for a meaningful time period                                          |
| Other analyses   | 17          | Reports other analyses done - e.g., analyses of subgroups and interactions, and sensitivity analyses                                                                                                                                                                                                                                                                                                                                       |
| Discussion       |             |                                                                                                                                                                                                                                                                                                                                                                                                                                            |
| Key results      | 18          | Summarizes key results with reference to study objectives                                                                                                                                                                                                                                                                                                                                                                                  |
| Limitations      | 19          | Discusses limitations of the study, taking into account sources of potential bias or imprecision; discuss both direction and magnitude of any potential bias                                                                                                                                                                                                                                                                               |
| Interpretation   | 20          | Gives a cautious overall interpretation of results considering objectives, limitations, multiplicity of analyses, results from similar studies, and other relevant evidence                                                                                                                                                                                                                                                                |
| Generalizability | 21          | Discusses the generalizability (external validity) of the study results                                                                                                                                                                                                                                                                                                                                                                    |



|                   |    |   |   |   |   |   |   |   |   |   |   |   |   |   |
|-------------------|----|---|---|---|---|---|---|---|---|---|---|---|---|---|
| Participants      | 13 | √ | √ | √ | √ | √ | √ | √ | √ | √ | √ | √ | √ | √ |
| Descriptive data  | 14 | √ | √ | √ | √ | √ | √ | √ | √ | √ | √ | √ | √ | √ |
| Outcome data      | 15 | x | x | √ | √ | √ | √ | √ | √ | √ | √ | x | √ | √ |
| Main results      | 16 | x | x | √ | √ | √ | √ | √ | √ | √ | √ | x | √ | √ |
| Other analyses    | 17 | √ | √ | √ | √ | √ | √ | √ | √ | √ | √ | √ | √ | √ |
| Discussion        |    |   |   |   |   |   |   |   |   |   |   |   |   |   |
| Key results       | 18 | √ | √ | √ | √ | √ | √ | √ | √ | √ | √ | √ | √ | √ |
| Limitations       | 19 | √ | √ | √ | √ | √ | √ | √ | √ | √ | √ | √ | √ | √ |
| Interpretation    | 20 | √ | √ | √ | √ | √ | √ | √ | √ | √ | √ | √ | √ | √ |
| Generalizability  | 21 | √ | √ | √ | √ | √ | √ | √ | √ | √ | √ | √ | √ | √ |
| Other information |    |   |   |   |   |   |   |   |   |   |   |   |   |   |
| Funding           | 22 | √ | √ | √ | √ | √ | √ | √ | √ | √ | √ | √ | √ | √ |

\* Potential sources of bias mentioned in the discussion section or as a limitation of the study
